# Supplementary material for: Mapping of West Siberian taiga wetland complexes using Landsat imagery:implications for methane emissions
Source: Copernicus journal article supplement (doi:10.5194/bg-13-4615-2016), 2016-08-16
Supplement: Supplementary file 1 [file bg-13-4615-2016-supplement.zip]

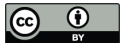

## *Supplement of*

# **Mapping of West Siberian taiga wetland complexes using Landsat imagery: implications for methane emissions**

**Irina Evgenievna Terentieva et al.**

*Correspondence to:* Irina Evgenievna Terentieva (kleptsova@gmail.com)

- bg-13-4615-2016-supplement-title-page.pdf
- Geobotanical\_Zones\_GCS.dbf
- Geobotanical\_Zones\_GCS.sbn
- Geobotanical\_Zones\_GCS.sbx
- Geobotanical\_Zones\_GCS.shp
- Geobotanical\_Zones\_GCS.shx
- Grid\_taiga\_BG.dbf
- Grid\_taiga\_BG.prj
- Grid\_taiga\_BG.qpj
- Grid\_taiga\_BG.shp
- Grid\_taiga\_BG.shx
- ReadMe.txt
- Style.sld
- StyleForQGIS.qml

The copyright of individual parts of the supplement might differ from the CC-BY 3.0 licence.
